# Supplementary material for: Discovery and characterization of a novel potent type II native and mutant BCR-ABL inhibitor (CHMFL-074) for Chronic Myeloid Leukemia (CML)
Source: PubMed Central journal article supplement (PMC5216742; doi:10.18632/oncotarget.10037), 2016-06-14
Supplement: oncotarget-07-45562-s001.pdf [file oncotarget-07-45562-s001.pdf]

# Discovery and characterization of a novel potent type II native and mutant BCR-ABL inhibitor (CHMFL-074) for Chronic Myeloid Leukemia (CML)

## Supplementary Materials

CLUSTAL O(1.2.1) multiple sequence alignment

```

1T46:A|KIT      GNNYVYIDPTQLPYDHKWEFPRNRLSFGKTLGAGAFGKVVVEATAYGLIKSDAAMTVAVKM
PDGFRA         -----LVLGRVLGSGAFGKVVVEGTAYGLSRSQPVMKVAVKM
PDGFRB         -----LVLGRVLTGSGAFGQVVVEATAHGLSHSQATMKVAVKM
                *  .*: .**:****:***:**:*  .*:  .*.*****

1T46:A|KIT      LKPSAHLTEREALMSELKVLSYLGNHMNIIVNLLGACTIGGPTLVITEYCCYGDLLNFLRR
PDGFRA         LKPTARSSEKQALMSELKIMTHLGPLNIVNLLGACTKSGPIYIITEYCFYGDVLYLHK
PDGFRB         LKSTARSEKQALMSELKIMSHLGPLNIVNLLGACTKGGPIYIITEYCRYGDLVDLYHR
                **  .*:  .*:*****:***:**  .*:*****  .**  .*****  *****:*.:.

1T46:A|KIT      KRDSFICSKTSPAIMEDDELALDLELLSFSYQVAKGMAFLASKNCIHRDLAARNILLTH
PDGFRA         NRDSFE-----GLTLLDLLSFTYQVARGMEFLASKNCVHRDLAARNVLLAQ
PDGFRB         NKHTFP-----VLSYMDLVGFSYQVANGMEFLASKNCVHRDLAARNVLICE
                :.:.*                *  .*: .**:****:***:**:*  .*:*****:*.:.

1T46:A|KIT      GRITKICDFGLARDIKNDSNYVVKGNARLPVKWMAPESIFNCVYTFESDVWSYGIFLWEL
PDGFRA         GKIVKICDFGLARDIMHDSNYVSKGSTFLPVKWMAPESIFDNLYTTLSDVWSYGILLWEI
PDGFRB         GKLVKICDFGLARDIMRDSNYISKGSTFLPLKWMAPESIFNSLYTTLSDVWSFGILLWEI
                **: .*****  .****: **  .*:*****: .**  *****:***:**:

1T46:A|KIT      FSLGSSPYPGMPVDSKFYKMIKEGFRMLSPEHAPAEMYDIMKTCWDADPLKRPTFKQIVQ
PDGFRA         FSLGGTPYPGMMVDSTFYNKIKSGYMAKPDHATSEVYEIMVKCWNSEPEKRPSFYHLSE
PDGFRB         FTLGGTPYPELPMNEQFYNAIKRGYMAQPAHASDEIYEIMQKCWEEKFEIRPPFSQLVL
                *:** .***  : .:. **  **  .**  *  **  .**:*  .**  .  **  *  .:

1T46:A|KIT      LIEKQISESTNHI
PDGFRA         IVENL-----
PDGFRB         LLERL-----
                :*: .
    
```

Supplementary Figure S1: Sequence alignment of PDGFR  $\alpha/\beta$  with cKit.

Supplementary Table S1: Kinomewide selectivity profiling of CHMFL-074 with DiscoverX's KinomeScan™ technology. See Supplementary\_Table\_S1

**Supplementary Table S2: Potential targets revealed by KinomeScan™ Profiling bear the % control number less than 1 at 1 μM concentration of CHMFL-074**

| <b>Kinases</b>                | <b>% Control</b> |
|-------------------------------|------------------|
| ABL1(E255K)-phosphorylated    | 0.3              |
| ABL1(H396P)-nonphosphorylated | 0.15             |
| ABL1(H396P)-phosphorylated    | 0.3              |
| ABL1(M351T)-phosphorylated    | 1                |
| ABL1(Q252H)-nonphosphorylated | 0.75             |
| ABL1(Q252H)-phosphorylated    | 0.4              |
| ABL1(Y253F)-phosphorylated    | 0.3              |
| ABL1-nonphosphorylated        | 0.25             |
| ABL1-phosphorylated           | 0.2              |
| ABL2                          | 0.8              |
| BLK                           | 0                |
| CSF1R                         | 0.2              |
| DDR1                          | 0.6              |
| DDR2                          | 0                |
| KIT(L576P)                    | 1                |
| KIT(V559D)                    | 0.45             |
| LCK                           | 0.2              |
| LOK                           | 0.1              |
| PDGFRB                        | 0.2              |
| RET                           | 0.05             |
| RET(M918T)                    | 0.15             |

**Supplementary Table S3: Crystal structure data collection and refinement statistics**

| Structure and<br>PDB ID             | ABL1/CHMFL-074 complex<br>5HU9 |
|-------------------------------------|--------------------------------|
| <b>Data collection*</b>             |                                |
| Space group                         | C222 <sub>1</sub>              |
| Cell dimensions                     |                                |
| <i>a</i> , <i>b</i> , <i>c</i> (Å)  | 37.8, 108.4, 146.3             |
| $\alpha$ , $\beta$ , $\gamma$ (°)   | 90.0, 90.0, 90.0               |
| Resolution (Å)                      | 50–1.53 (1.56–1.53)            |
| R <sub>p.i.m.</sub> (%)**           | 2.8 (35.8)                     |
| <i>I</i> / $\sigma$                 | 27.1 (2.0)                     |
| Completeness (%)                    | 97.7 (89.6)                    |
| Redundancy                          | 12.0 (10.1)                    |
| <b>Refinement</b>                   |                                |
| Resolution (Å)                      | 43.56–1.53                     |
| No. reflections                     | 44775                          |
| R <sub>wor</sub> /R <sub>free</sub> | 0.185/0.196                    |
| No. atoms                           |                                |
| <i>Protein</i>                      | 2251                           |
| <i>Ligand/ion</i>                   | 135                            |
| <i>Water</i>                        | 365                            |
| B-factors                           |                                |
| <i>Protein</i>                      | 28.4                           |
| <i>Ligand/ion</i>                   | 31.5                           |
| <i>Water</i>                        | 42.8                           |
| R.m.s. deviations                   |                                |
| <i>Bond lengths</i> (Å)             | 0.023                          |
| <i>Bond angles</i> (°)              | 1.689                          |
| Ramachandran Plot                   |                                |
| <i>Favoured region</i>              | 97.50%                         |
| <i>Allowed region</i>               | 2.50%                          |
| <i>Outliers</i>                     | 0.00%                          |
